# Supplementary material
Source: PubMed Central journal article supplement (PMC3516884)
Supplement: NIHMS405968-supplement-Supporting_Information.pdf [file NIHMS405968-supplement-Supporting_Information.pdf]

Supporting Information for  
**Evidence for C-H Hydrogen Bonding in t-Butyl  
Cation Salts**

Evgenii S. Stoyanov,\* Irina V. Stoyanova, Fook S. Tham, Christopher A. Reed\*

*Department of Chemistry, University of California, Riverside, California 92521, USA*

X-ray structure of  $[t\text{-Bu}^+][\text{CHB}_{11}\text{Cl}_{11}^-]$

(12 pages total)

## X-Ray Structure Determination of [t-Bu<sup>+</sup>][CHB<sub>11</sub>Cl<sub>11</sub>]<sup>-</sup>

A colorless fragment of a prism (0.52 x 0.20 x 0.17 mm<sup>3</sup>) was used for the single crystal x-ray diffraction study of (CH<sub>3</sub>)<sub>3</sub>C<sup>+</sup>CHB<sub>11</sub>Cl<sub>11</sub><sup>-</sup> (sample cr133\_0m). The crystal was coated with perfluoropolyethers (PFPE) oil and mounted on to a cryo-loop glass fiber. X-ray intensity data were collected at 100(2) K on a Bruker APEX2 (ref. 1) platform-CCD x-ray diffractometer system (Mo-radiation,  $\lambda = 0.71073 \text{ \AA}$ , 50KV/40mA power). The CCD detector was placed at a distance of 5.1000 cm from the crystal.

A total of 4800 frames were collected for a hemisphere of reflections (with scan width of 0.3° in  $\omega$ , starting  $\omega$  at -30° and -60° and  $2\theta$  at -30° and -60°, and  $\phi$  angles of 0°, 90°, 180°, and 270° for every 600 frames, 10 sec/frame exposure time). The frames were integrated using the Bruker SAINT software package (ref. 2) and using a narrow-frame integration algorithm. Based on a monoclinic crystal system, the integrated frames yielded a total of 82310 reflections at a maximum  $2\theta$  angle of 80.50° (0.55 Å resolution), of which 13573 were independent reflections ( $R_{\text{int}} = 0.0375$ ,  $R_{\text{sig}} = 0.0337$ , redundancy = 6.1, completeness = 99.3%) and 10581 (78.0%) reflections were greater than  $2\sigma(I)$ . The unit cell parameters were,  $a = 10.8992(2) \text{ \AA}$ ,  $b = 11.9178(3) \text{ \AA}$ ,  $c = 16.9970(4) \text{ \AA}$ ,  $\beta = 100.315(1)^\circ$ ,  $V = 2172.13(8) \text{ \AA}^3$ ,  $Z = 4$ , calculated density  $D_c = 1.770 \text{ g/cm}^3$ . Absorption corrections were applied (absorption coefficient  $\mu = 1.399 \text{ mm}^{-1}$ ; max/min transmission = 0.8010/0.5272) to the raw intensity data using the SADABS program (ref. 3).

The Bruker SHELXTL software package (ref. 4) was used for phase determination and structure refinement. The distribution of intensities ( $E^2-1 = 0.991$ ) and systematic absent reflections indicated one possible space group; P2(1)/c. The space group P2(1)/c (#14) was later determined to be correct. Direct methods of phase determination followed by two Fourier cycles of refinement led to an electron density map from which most of the non-hydrogen atoms were identified in the asymmetry unit of the unit cell. With subsequent isotropic refinement, all of the non-hydrogen atoms were identified. There were one cation of [CH<sub>3</sub>]<sub>3</sub>C<sup>+</sup> and one anion of CHB<sub>11</sub>Cl<sub>11</sub><sup>-</sup> present in the asymmetry unit of the unit cell. Because the sample was collected at high resolution (0.55 Å), all tertiary-butyl cation H-atom positions were refined without the H-atom riding model constraints. The possible C-H...Cl hydrogen bond angles and distances were generated using HTAB, which deviated from the normal D-H...A angles and distances using H-atom riding model. The Alerts level B in the checkcif file is flagged because of the unconstrained H-atom positions refinement.

Atomic coordinates, isotropic and anisotropic displacement parameters of all the non-hydrogen atoms were refined by means of a full matrix least-squares procedure on  $F^2$ . The H-atom

positions of the cation were refined unconstrained. The refinement converged at  $R1 = 0.0265$ ,  $wR2 = 0.0611$ , with intensity,  $I > 2\sigma(I)$ . The largest peak/hole in the final difference map was  $0.635/-0.440 \text{ e}/\text{\AA}^3$ .

The cif file has been deposited with the Cambridge Crystallographic Data Center: # 874494.

#### REFERENCES

1. *APEX 2*, version 2011.4-1, Bruker (2011), Bruker AXS Inc., Madison, Wisconsin, USA.
2. *SAINT*, version V7.60A, Bruker (2009), Bruker AXS Inc., Madison, Wisconsin, USA.
3. *SADABS*, version 2008/1, Bruker (2008), Bruker AXS Inc., Madison, Wisconsin, USA.
4. *SHELXTL*, version 2008/4, Bruker (2008), Bruker AXS Inc., Madison, Wisconsin, USA.

| <b>Table 1.</b> Crystal data and structure refinement for cr133_0m. |                                             |                              |
|---------------------------------------------------------------------|---------------------------------------------|------------------------------|
| Identification code                                                 | cr133_0m                                    |                              |
| Empirical formula                                                   | C5 H10 B11 Cl11                             |                              |
| Formula weight                                                      | 578.99                                      |                              |
| Temperature                                                         | 100(2) K                                    |                              |
| Wavelength                                                          | 0.71073 Å                                   |                              |
| Crystal system                                                      | Monoclinic                                  |                              |
| Space group                                                         | P2(1)/c (#14)                               |                              |
| Unit cell dimensions                                                | a = 10.8992(2) Å                            | $\alpha = 90^\circ$ .        |
|                                                                     | b = 11.9178(3) Å                            | $\beta = 100.315(1)^\circ$ . |
|                                                                     | c = 16.9970(4) Å                            | $\gamma = 90^\circ$ .        |
| Volume                                                              | 2172.13(8) Å <sup>3</sup>                   |                              |
| Z                                                                   | 4                                           |                              |
| Density (calculated)                                                | 1.770 Mg/m <sup>3</sup>                     |                              |
| Absorption coefficient                                              | 1.399 mm <sup>-1</sup>                      |                              |
| F(000)                                                              | 1128                                        |                              |
| Crystal size                                                        | 0.52 x 0.20 x 0.17 mm <sup>3</sup>          |                              |
| Theta range for data collection                                     | 1.90 to 40.25°                              |                              |
| Index ranges                                                        | -19<=h<=19, -21<=k<=21, -30<=l<=30          |                              |
| Reflections collected                                               | 82310                                       |                              |
| Independent reflections                                             | 13573 [R(int) = 0.0375]                     |                              |
| Completeness to theta = 40.25°                                      | 99.3 %                                      |                              |
| Absorption correction                                               | Semi-empirical from equivalents             |                              |
| Max. and min. transmission                                          | 0.8010 and 0.5272                           |                              |
| Refinement method                                                   | Full-matrix least-squares on F <sup>2</sup> |                              |
| Data / restraints / parameters                                      | 13573 / 0 / 284                             |                              |
| Goodness-of-fit on F <sup>2</sup>                                   | 1.060                                       |                              |
| Final R indices [I>2sigma(I)]                                       | R1 = 0.0265, wR2 = 0.0611                   |                              |
| R indices (all data)                                                | R1 = 0.0408, wR2 = 0.0651                   |                              |
| Largest diff. peak and hole                                         | 0.635 and -0.440 e.Å <sup>-3</sup>          |                              |

**Table 2.** Atomic coordinates ( $\times 10^4$ ) and equivalent isotropic displacement parameters ( $\text{\AA}^2 \times 10^3$ ) for cr133\_0m.  $U(\text{eq})$  is defined as one third of the trace of the orthogonalized  $U^{ij}$  tensor.

|        | x       | y       | z       | U(eq) |
|--------|---------|---------|---------|-------|
| C(1A)  | 3610(1) | 1739(1) | 2574(1) | 12(1) |
| B(2)   | 2354(1) | 1207(1) | 2937(1) | 11(1) |
| B(3)   | 2156(1) | 1939(1) | 2005(1) | 12(1) |
| B(4)   | 3348(1) | 2993(1) | 2076(1) | 12(1) |
| B(5)   | 4275(1) | 2916(1) | 3056(1) | 12(1) |
| B(6)   | 3662(1) | 1814(1) | 3588(1) | 12(1) |
| B(7)   | 2118(1) | 2176(1) | 3693(1) | 11(1) |
| B(8)   | 1178(1) | 2265(1) | 2712(1) | 11(1) |
| B(9)   | 1796(1) | 3367(1) | 2175(1) | 12(1) |
| B(10)  | 3108(1) | 3970(1) | 2826(1) | 12(1) |
| B(11)  | 3312(1) | 3238(1) | 3769(1) | 12(1) |
| B(12)  | 1778(1) | 3515(1) | 3228(1) | 11(1) |
| Cl(1)  | 2096(1) | -254(1) | 2954(1) | 15(1) |
| Cl(2)  | 1701(1) | 1199(1) | 1098(1) | 16(1) |
| Cl(3)  | 4062(1) | 3309(1) | 1250(1) | 17(1) |
| Cl(4)  | 5903(1) | 3161(1) | 3195(1) | 18(1) |
| Cl(5)  | 4669(1) | 945(1)  | 4259(1) | 16(1) |
| Cl(6)  | 1479(1) | 1715(1) | 4529(1) | 14(1) |
| Cl(7)  | -444(1) | 1957(1) | 2547(1) | 15(1) |
| Cl(8)  | 817(1)  | 4154(1) | 1423(1) | 16(1) |
| Cl(9)  | 3500(1) | 5417(1) | 2757(1) | 17(1) |
| Cl(10) | 3932(1) | 3931(1) | 4679(1) | 16(1) |
| Cl(11) | 787(1)  | 4479(1) | 3608(1) | 15(1) |
| C(1)   | 7893(1) | 2585(1) | 34(1)   | 19(1) |
| C(2)   | 7078(1) | 2345(1) | 602(1)  | 31(1) |
| C(3)   | 8032(1) | 3716(1) | -241(1) | 31(1) |
| C(4)   | 8571(1) | 1674(1) | -259(1) | 31(1) |

**Table 3.** Bond lengths [Å] and angles [°] for cr133\_0m.

---

|              |            |
|--------------|------------|
| C(1A)-B(6)   | 1.7160(11) |
| C(1A)-B(4)   | 1.7165(11) |
| C(1A)-B(5)   | 1.7172(11) |
| C(1A)-B(3)   | 1.7186(11) |
| C(1A)-B(2)   | 1.7205(11) |
| C(1A)-H(1)   | 0.957(12)  |
| B(2)-Cl(1)   | 1.7649(8)  |
| B(2)-B(7)    | 1.7802(11) |
| B(2)-B(3)    | 1.7873(11) |
| B(2)-B(8)    | 1.7897(11) |
| B(2)-B(6)    | 1.7929(12) |
| B(3)-Cl(2)   | 1.7686(8)  |
| B(3)-B(9)    | 1.7817(12) |
| B(3)-B(8)    | 1.7864(11) |
| B(3)-B(4)    | 1.7958(12) |
| B(4)-Cl(3)   | 1.7622(8)  |
| B(4)-B(10)   | 1.7809(12) |
| B(4)-B(9)    | 1.7855(12) |
| B(4)-B(5)    | 1.7903(12) |
| B(5)-Cl(4)   | 1.7719(8)  |
| B(5)-B(11)   | 1.7806(12) |
| B(5)-B(10)   | 1.7810(12) |
| B(5)-B(6)    | 1.7897(12) |
| B(6)-Cl(5)   | 1.7690(8)  |
| B(6)-B(7)    | 1.7775(11) |
| B(6)-B(11)   | 1.7789(12) |
| B(7)-Cl(6)   | 1.7771(8)  |
| B(7)-B(12)   | 1.7903(11) |
| B(7)-B(8)    | 1.7968(11) |
| B(7)-B(11)   | 1.8041(12) |
| B(8)-Cl(7)   | 1.7777(8)  |
| B(8)-B(12)   | 1.7922(12) |
| B(8)-B(9)    | 1.7987(11) |
| B(9)-Cl(8)   | 1.7790(8)  |
| B(9)-B(10)   | 1.7950(12) |
| B(9)-B(12)   | 1.8027(11) |
| B(10)-Cl(9)  | 1.7855(8)  |
| B(10)-B(12)  | 1.7937(11) |
| B(10)-B(11)  | 1.8025(12) |
| B(11)-Cl(10) | 1.7775(8)  |
| B(11)-B(12)  | 1.7886(12) |
| B(12)-Cl(11) | 1.7764(8)  |
| C(1)-C(3)    | 1.4434(14) |
| C(1)-C(4)    | 1.4506(14) |
| C(1)-C(2)    | 1.4525(14) |
| C(2)-H(2A)   | 0.995(18)  |
| C(2)-H(2B)   | 0.86(2)    |
| C(2)-H(2C)   | 0.90(3)    |
| C(3)-H(3A)   | 0.89(2)    |
| C(3)-H(3B)   | 0.926(18)  |
| C(3)-H(3C)   | 1.01(2)    |
| C(4)-H(4A)   | 0.916(16)  |
| C(4)-H(4B)   | 0.911(19)  |
| C(4)-H(4C)   | 0.924(18)  |

|                  |           |
|------------------|-----------|
| B(6)-C(1A)-B(4)  | 115.05(6) |
| B(6)-C(1A)-B(5)  | 62.84(5)  |
| B(4)-C(1A)-B(5)  | 62.85(5)  |
| B(6)-C(1A)-B(3)  | 114.80(6) |
| B(4)-C(1A)-B(3)  | 63.04(5)  |
| B(5)-C(1A)-B(3)  | 115.06(6) |
| B(6)-C(1A)-B(2)  | 62.90(5)  |
| B(4)-C(1A)-B(2)  | 115.18(6) |
| B(5)-C(1A)-B(2)  | 115.15(6) |
| B(3)-C(1A)-B(2)  | 62.63(5)  |
| B(6)-C(1A)-H(1)  | 119.3(7)  |
| B(4)-C(1A)-H(1)  | 116.1(7)  |
| B(5)-C(1A)-H(1)  | 118.2(7)  |
| B(3)-C(1A)-H(1)  | 116.1(7)  |
| B(2)-C(1A)-H(1)  | 117.7(7)  |
| C(1A)-B(2)-Cl(1) | 120.60(5) |
| C(1A)-B(2)-B(7)  | 104.29(5) |
| Cl(1)-B(2)-B(7)  | 125.74(5) |
| C(1A)-B(2)-B(3)  | 58.63(4)  |
| Cl(1)-B(2)-B(3)  | 120.12(5) |
| B(7)-B(2)-B(3)   | 108.25(6) |
| C(1A)-B(2)-B(8)  | 104.42(5) |
| Cl(1)-B(2)-B(8)  | 126.06(5) |
| B(7)-B(2)-B(8)   | 60.44(4)  |
| B(3)-B(2)-B(8)   | 59.92(4)  |
| C(1A)-B(2)-B(6)  | 58.43(4)  |
| Cl(1)-B(2)-B(6)  | 119.94(5) |
| B(7)-B(2)-B(6)   | 59.66(4)  |
| B(3)-B(2)-B(6)   | 107.83(6) |
| B(8)-B(2)-B(6)   | 107.92(6) |
| C(1A)-B(3)-Cl(2) | 120.55(5) |
| C(1A)-B(3)-B(9)  | 104.39(6) |
| Cl(2)-B(3)-B(9)  | 125.57(5) |
| C(1A)-B(3)-B(8)  | 104.64(5) |
| Cl(2)-B(3)-B(8)  | 125.94(5) |
| B(9)-B(3)-B(8)   | 60.54(4)  |
| C(1A)-B(3)-B(2)  | 58.74(4)  |
| Cl(2)-B(3)-B(2)  | 120.01(5) |
| B(9)-B(3)-B(2)   | 108.54(6) |
| B(8)-B(3)-B(2)   | 60.10(4)  |
| C(1A)-B(3)-B(4)  | 58.42(5)  |
| Cl(2)-B(3)-B(4)  | 119.58(5) |
| B(9)-B(3)-B(4)   | 59.88(5)  |
| B(8)-B(3)-B(4)   | 108.34(6) |
| B(2)-B(3)-B(4)   | 108.15(6) |
| C(1A)-B(4)-Cl(3) | 121.38(5) |
| C(1A)-B(4)-B(10) | 104.38(6) |
| Cl(3)-B(4)-B(10) | 124.97(6) |
| C(1A)-B(4)-B(9)  | 104.32(5) |
| Cl(3)-B(4)-B(9)  | 125.61(6) |
| B(10)-B(4)-B(9)  | 60.44(5)  |
| C(1A)-B(4)-B(5)  | 58.59(5)  |
| Cl(3)-B(4)-B(5)  | 119.76(5) |
| B(10)-B(4)-B(5)  | 59.83(5)  |
| B(9)-B(4)-B(5)   | 108.14(6) |

|                  |           |
|------------------|-----------|
| C(1A)-B(4)-B(3)  | 58.54(4)  |
| Cl(3)-B(4)-B(3)  | 120.88(5) |
| B(10)-B(4)-B(3)  | 107.96(6) |
| B(9)-B(4)-B(3)   | 59.67(5)  |
| B(5)-B(4)-B(3)   | 107.86(6) |
| C(1A)-B(5)-Cl(4) | 121.68(5) |
| C(1A)-B(5)-B(11) | 104.54(5) |
| Cl(4)-B(5)-B(11) | 124.90(6) |
| C(1A)-B(5)-B(10) | 104.34(6) |
| Cl(4)-B(5)-B(10) | 124.82(5) |
| B(11)-B(5)-B(10) | 60.81(5)  |
| C(1A)-B(5)-B(6)  | 58.55(4)  |
| Cl(4)-B(5)-B(6)  | 120.64(5) |
| B(11)-B(5)-B(6)  | 59.77(5)  |
| B(10)-B(5)-B(6)  | 108.20(6) |
| C(1A)-B(5)-B(4)  | 58.55(5)  |
| Cl(4)-B(5)-B(4)  | 119.99(5) |
| B(11)-B(5)-B(4)  | 108.60(6) |
| B(10)-B(5)-B(4)  | 59.82(5)  |
| B(6)-B(5)-B(4)   | 107.97(6) |
| C(1A)-B(6)-Cl(5) | 121.47(5) |
| C(1A)-B(6)-B(7)  | 104.59(6) |
| Cl(5)-B(6)-B(7)  | 124.53(5) |
| C(1A)-B(6)-B(11) | 104.67(6) |
| Cl(5)-B(6)-B(11) | 125.09(5) |
| B(7)-B(6)-B(11)  | 60.97(5)  |
| C(1A)-B(6)-B(5)  | 58.62(4)  |
| Cl(5)-B(6)-B(5)  | 120.69(5) |
| B(7)-B(6)-B(5)   | 108.57(6) |
| B(11)-B(6)-B(5)  | 59.86(5)  |
| C(1A)-B(6)-B(2)  | 58.67(4)  |
| Cl(5)-B(6)-B(2)  | 119.64(5) |
| B(7)-B(6)-B(2)   | 59.81(5)  |
| B(11)-B(6)-B(2)  | 108.67(6) |
| B(5)-B(6)-B(2)   | 108.18(6) |
| Cl(6)-B(7)-B(6)  | 121.26(5) |
| Cl(6)-B(7)-B(2)  | 120.32(5) |
| B(6)-B(7)-B(2)   | 60.52(5)  |
| Cl(6)-B(7)-B(12) | 123.28(5) |
| B(6)-B(7)-B(12)  | 107.26(5) |
| B(2)-B(7)-B(12)  | 107.75(5) |
| Cl(6)-B(7)-B(8)  | 121.36(5) |
| B(6)-B(7)-B(8)   | 108.28(5) |
| B(2)-B(7)-B(8)   | 60.04(4)  |
| B(12)-B(7)-B(8)  | 59.95(4)  |
| Cl(6)-B(7)-B(11) | 122.72(5) |
| B(6)-B(7)-B(11)  | 59.55(5)  |
| B(2)-B(7)-B(11)  | 108.11(5) |
| B(12)-B(7)-B(11) | 59.68(5)  |
| B(8)-B(7)-B(11)  | 107.99(5) |
| Cl(7)-B(8)-B(3)  | 123.08(5) |
| Cl(7)-B(8)-B(2)  | 122.83(5) |
| B(3)-B(8)-B(2)   | 59.97(5)  |
| Cl(7)-B(8)-B(12) | 120.94(5) |
| B(3)-B(8)-B(12)  | 107.48(5) |
| B(2)-B(8)-B(12)  | 107.25(6) |

|                    |           |
|--------------------|-----------|
| Cl(7)-B(8)-B(7)    | 121.29(5) |
| B(3)-B(8)-B(7)     | 107.56(5) |
| B(2)-B(8)-B(7)     | 59.52(4)  |
| B(12)-B(8)-B(7)    | 59.84(4)  |
| Cl(7)-B(8)-B(9)    | 121.55(5) |
| B(3)-B(8)-B(9)     | 59.60(4)  |
| B(2)-B(8)-B(9)     | 107.69(5) |
| B(12)-B(8)-B(9)    | 60.27(5)  |
| B(7)-B(8)-B(9)     | 108.13(5) |
| Cl(8)-B(9)-B(3)    | 120.58(5) |
| Cl(8)-B(9)-B(4)    | 121.36(5) |
| B(3)-B(9)-B(4)     | 60.45(5)  |
| Cl(8)-B(9)-B(10)   | 122.78(5) |
| B(3)-B(9)-B(10)    | 107.96(6) |
| B(4)-B(9)-B(10)    | 59.65(5)  |
| Cl(8)-B(9)-B(8)    | 121.25(5) |
| B(3)-B(9)-B(8)     | 59.86(4)  |
| B(4)-B(9)-B(8)     | 108.25(6) |
| B(10)-B(9)-B(8)    | 107.98(6) |
| Cl(8)-B(9)-B(12)   | 123.36(5) |
| B(3)-B(9)-B(12)    | 107.22(5) |
| B(4)-B(9)-B(12)    | 107.29(6) |
| B(10)-B(9)-B(12)   | 59.81(4)  |
| B(8)-B(9)-B(12)    | 59.69(4)  |
| B(4)-B(10)-B(5)    | 60.35(5)  |
| B(4)-B(10)-Cl(9)   | 121.13(5) |
| B(5)-B(10)-Cl(9)   | 121.76(5) |
| B(4)-B(10)-B(12)   | 107.88(6) |
| B(5)-B(10)-B(12)   | 107.27(6) |
| Cl(9)-B(10)-B(12)  | 122.44(5) |
| B(4)-B(10)-B(9)    | 59.91(5)  |
| B(5)-B(10)-B(9)    | 108.13(6) |
| Cl(9)-B(10)-B(9)   | 121.33(5) |
| B(12)-B(10)-B(9)   | 60.31(5)  |
| B(4)-B(10)-B(11)   | 108.04(6) |
| B(5)-B(10)-B(11)   | 59.59(5)  |
| Cl(9)-B(10)-B(11)  | 122.21(5) |
| B(12)-B(10)-B(11)  | 59.65(5)  |
| B(9)-B(10)-B(11)   | 108.19(6) |
| Cl(10)-B(11)-B(6)  | 122.26(5) |
| Cl(10)-B(11)-B(5)  | 120.92(5) |
| B(6)-B(11)-B(5)    | 60.37(5)  |
| Cl(10)-B(11)-B(12) | 122.47(5) |
| B(6)-B(11)-B(12)   | 107.27(6) |
| B(5)-B(11)-B(12)   | 107.51(6) |
| Cl(10)-B(11)-B(10) | 121.08(5) |
| B(6)-B(11)-B(10)   | 107.73(6) |
| B(5)-B(11)-B(10)   | 59.61(5)  |
| B(12)-B(11)-B(10)  | 59.93(4)  |
| Cl(10)-B(11)-B(7)  | 123.04(5) |
| B(6)-B(11)-B(7)    | 59.48(4)  |
| B(5)-B(11)-B(7)    | 107.79(6) |
| B(12)-B(11)-B(7)   | 59.77(5)  |
| B(10)-B(11)-B(7)   | 107.69(6) |
| Cl(11)-B(12)-B(11) | 120.39(5) |
| Cl(11)-B(12)-B(7)  | 120.47(5) |

|                    |            |
|--------------------|------------|
| B(11)-B(12)-B(7)   | 60.55(5)   |
| Cl(11)-B(12)-B(8)  | 121.56(5)  |
| B(11)-B(12)-B(8)   | 108.89(6)  |
| B(7)-B(12)-B(8)    | 60.21(4)   |
| Cl(11)-B(12)-B(10) | 121.92(5)  |
| B(11)-B(12)-B(10)  | 60.42(5)   |
| B(7)-B(12)-B(10)   | 108.69(5)  |
| B(8)-B(12)-B(10)   | 108.33(6)  |
| Cl(11)-B(12)-B(9)  | 122.71(5)  |
| B(11)-B(12)-B(9)   | 108.47(6)  |
| B(7)-B(12)-B(9)    | 108.24(5)  |
| B(8)-B(12)-B(9)    | 60.04(4)   |
| B(10)-B(12)-B(9)   | 59.88(5)   |
| C(3)-C(1)-C(4)     | 119.90(10) |
| C(3)-C(1)-C(2)     | 120.72(10) |
| C(4)-C(1)-C(2)     | 119.37(10) |
| C(1)-C(2)-H(2A)    | 114.7(10)  |
| C(1)-C(2)-H(2B)    | 116.5(16)  |
| H(2A)-C(2)-H(2B)   | 111.8(18)  |
| C(1)-C(2)-H(2C)    | 101.3(16)  |
| H(2A)-C(2)-H(2C)   | 104.3(18)  |
| H(2B)-C(2)-H(2C)   | 106(2)     |
| C(1)-C(3)-H(3A)    | 106.6(13)  |
| C(1)-C(3)-H(3B)    | 114.3(11)  |
| H(3A)-C(3)-H(3B)   | 97.1(16)   |
| C(1)-C(3)-H(3C)    | 112.2(13)  |
| H(3A)-C(3)-H(3C)   | 105.8(17)  |
| H(3B)-C(3)-H(3C)   | 118.5(16)  |
| C(1)-C(4)-H(4A)    | 112.6(10)  |
| C(1)-C(4)-H(4B)    | 113.9(11)  |
| H(4A)-C(4)-H(4B)   | 111.5(14)  |
| C(1)-C(4)-H(4C)    | 101.1(11)  |
| H(4A)-C(4)-H(4C)   | 106.4(15)  |
| H(4B)-C(4)-H(4C)   | 110.7(15)  |

---

Symmetry transformations used to generate equivalent atoms:

**Table 4.** Anisotropic displacement parameters ( $\text{\AA}^2 \times 10^3$ ) for cr133\_0m. The anisotropic displacement factor exponent takes the form:  $-2\pi^2 [ h^2 a^{*2} U^{11} + \dots + 2 h k a^* b^* U^{12} ]$

|        | U <sup>11</sup> | U <sup>22</sup> | U <sup>33</sup> | U <sup>23</sup> | U <sup>13</sup> | U <sup>12</sup> |
|--------|-----------------|-----------------|-----------------|-----------------|-----------------|-----------------|
| C(1A)  | 11(1)           | 12(1)           | 13(1)           | 0(1)            | 3(1)            | 0(1)            |
| B(2)   | 11(1)           | 10(1)           | 12(1)           | 0(1)            | 3(1)            | 0(1)            |
| B(3)   | 12(1)           | 13(1)           | 11(1)           | 0(1)            | 2(1)            | 0(1)            |
| B(4)   | 12(1)           | 13(1)           | 12(1)           | 1(1)            | 5(1)            | -1(1)           |
| B(5)   | 10(1)           | 13(1)           | 14(1)           | 0(1)            | 3(1)            | -1(1)           |
| B(6)   | 11(1)           | 12(1)           | 12(1)           | 1(1)            | 2(1)            | 1(1)            |
| B(7)   | 11(1)           | 11(1)           | 11(1)           | 1(1)            | 3(1)            | 0(1)            |
| B(8)   | 9(1)            | 12(1)           | 11(1)           | 0(1)            | 2(1)            | -1(1)           |
| B(9)   | 12(1)           | 12(1)           | 11(1)           | 2(1)            | 2(1)            | 0(1)            |
| B(10)  | 12(1)           | 10(1)           | 13(1)           | 0(1)            | 3(1)            | -1(1)           |
| B(11)  | 12(1)           | 12(1)           | 11(1)           | 0(1)            | 1(1)            | -1(1)           |
| B(12)  | 10(1)           | 11(1)           | 12(1)           | 0(1)            | 3(1)            | 0(1)            |
| Cl(1)  | 17(1)           | 10(1)           | 19(1)           | 0(1)            | 5(1)            | -1(1)           |
| Cl(2)  | 18(1)           | 17(1)           | 11(1)           | -3(1)           | 3(1)            | -3(1)           |
| Cl(3)  | 19(1)           | 21(1)           | 14(1)           | 2(1)            | 8(1)            | -2(1)           |
| Cl(4)  | 10(1)           | 21(1)           | 23(1)           | 0(1)            | 3(1)            | -3(1)           |
| Cl(5)  | 14(1)           | 17(1)           | 16(1)           | 4(1)            | 0(1)            | 4(1)            |
| Cl(6)  | 16(1)           | 16(1)           | 11(1)           | 2(1)            | 5(1)            | 0(1)            |
| Cl(7)  | 9(1)            | 16(1)           | 18(1)           | -1(1)           | 2(1)            | -2(1)           |
| Cl(8)  | 17(1)           | 18(1)           | 13(1)           | 5(1)            | 2(1)            | 4(1)            |
| Cl(9)  | 17(1)           | 11(1)           | 23(1)           | 1(1)            | 6(1)            | -3(1)           |
| Cl(10) | 17(1)           | 17(1)           | 13(1)           | -4(1)           | 0(1)            | -3(1)           |
| Cl(11) | 15(1)           | 12(1)           | 18(1)           | 0(1)            | 6(1)            | 3(1)            |
| C(1)   | 14(1)           | 21(1)           | 20(1)           | -1(1)           | -2(1)           | -2(1)           |
| C(2)   | 29(1)           | 41(1)           | 24(1)           | 2(1)            | 7(1)            | -6(1)           |
| C(3)   | 23(1)           | 22(1)           | 46(1)           | 7(1)            | 3(1)            | -3(1)           |
| C(4)   | 26(1)           | 27(1)           | 40(1)           | -3(1)           | 5(1)            | 6(1)            |

**Table 5.** Hydrogen bonds for cr133\_0m [ $\text{\AA}$  and  $^\circ$ ].

| D-H...A               | d(D-H)    | d(H...A)  | d(D...A)   | $\angle$ (DHA) |
|-----------------------|-----------|-----------|------------|----------------|
| C(4)-H(4C)...Cl(6)#1  | 0.924(18) | 3.241(18) | 3.7778(13) | 119.1(14)      |
| C(4)-H(4C)...Cl(2)#2  | 0.924(18) | 2.910(19) | 3.8033(12) | 163.0(15)      |
| C(4)-H(4B)...Cl(11)#3 | 0.911(19) | 3.281(18) | 3.8082(13) | 119.1(13)      |
| C(4)-H(4B)...Cl(2)#4  | 0.911(19) | 3.012(19) | 3.6996(12) | 133.6(14)      |
| C(4)-H(4A)...Cl(11)#1 | 0.916(16) | 3.070(16) | 3.6181(12) | 120.2(11)      |
| C(4)-H(4A)...Cl(4)#5  | 0.916(16) | 3.247(15) | 3.5582(12) | 102.4(11)      |
| C(3)-H(3C)...Cl(6)#6  | 1.01(2)   | 2.98(2)   | 3.7815(12) | 136.7(16)      |
| C(3)-H(3C)...Cl(1)#6  | 1.01(2)   | 3.23(2)   | 4.1026(14) | 145.6(16)      |
| C(3)-H(3B)...Cl(8)#7  | 0.926(18) | 2.974(18) | 3.5989(11) | 126.2(13)      |
| C(3)-H(3B)...Cl(6)#1  | 0.926(18) | 3.101(18) | 3.8803(12) | 142.9(14)      |
| C(3)-H(3A)...Cl(4)#5  | 0.89(2)   | 3.32(2)   | 3.9045(13) | 125.4(15)      |
| C(3)-H(3A)...Cl(5)#5  | 0.89(2)   | 2.97(2)   | 3.6339(12) | 132.1(16)      |
| C(2)-H(2A)...Cl(1)#6  | 0.995(18) | 2.990(18) | 3.7719(13) | 136.2(12)      |
| C(2)-H(2A)...Cl(3)    | 0.995(18) | 3.169(17) | 3.8265(12) | 124.9(12)      |
| C(2)-H(2B)...Cl(7)#2  | 0.86(2)   | 3.32(2)   | 3.9046(12) | 127.7(18)      |
| C(2)-H(2B)...Cl(9)#3  | 0.86(2)   | 3.03(2)   | 3.7529(12) | 143.3(19)      |
| C(2)-H(2C)...Cl(5)#5  | 0.90(3)   | 3.30(3)   | 3.7566(13) | 114(2)         |
| C(2)-H(2C)...Cl(10)#5 | 0.90(3)   | 2.95(3)   | 3.8211(12) | 162(2)         |

Symmetry transformations used to generate equivalent atoms:

#1  $x+1, -y+1/2, z-1/2$  #2  $x+1, y, z$  #3  $-x+1, y-1/2, -z+1/2$   
#4  $-x+1, -y, -z$  #5  $x, -y+1/2, z-1/2$  #6  $-x+1, y+1/2, -z+1/2$   
#7  $-x+1, -y+1, -z$
